# Supplementary material for: Mapping Local Synergies: Spatio-Temporal Analysis of Switzerland’s Waste Heat Potentials vs. Heat Demand
Source: MDPI journal article supplement (doi:10.3390/en17010106), 2023-12-24
Supplement: s1 [file s1]

Archive with 1 entries (1 files):
- energies-2777744-supplementary.pdf
