# Supplementary material for: Mapping Local Synergies: Spatio-Temporal Analysis of Switzerland’s Waste Heat Potentials vs. Heat Demand
Source: MDPI journal article supplement (doi:10.3390/en17010106), 2023-12-24
Supplement: s1 [file s1 › energies-2777744-supplementary.pdf]

# Mapping Local Synergies: Spatio-Temporal Analysis of Switzerland's Waste Heat Potentials vs. Heat Demand

Vanessa Burg <sup>1,\*</sup>, Florent Richardet <sup>1</sup>, Severin Wälty <sup>1</sup>, Ramin Roshandel <sup>2</sup> and Stefanie Hellweg <sup>1</sup>

<sup>1</sup> Institute of Environmental Engineering, Swiss Federal Institute of Technology Zürich (ETH Zürich), John-von-Neumann-Weg 9, CH-8093 Zürich, Switzerland

<sup>2</sup> Department of Energy Engineering, Sharif University of Technology, Azadi Avenue, Tehran P.O. Box 11365-9567, Iran

\* Correspondence: vaburg@ethz.ch

## Contents

|                                              |          |
|----------------------------------------------|----------|
| <b>A. Methods .....</b>                      | <b>2</b> |
| A.1 Cement plants.....                       | 2        |
| A.2 Municipal solid waste incinerators ..... | 3        |
| A.3 Biogas plants.....                       | 3        |
| <b>B. Results .....</b>                      | <b>4</b> |
| B.1 Heat balance .....                       | 4        |

# Supplementary Information

## A. Methods

### A.1 Cement plants

Table S1. Annual cement production and specific heat demand per tonne of produced cement of the six Swiss cement plants.

| Cement Plant      | Cement Production [Mt] | Specific Heat Demand [MJ/t] |
|-------------------|------------------------|-----------------------------|
| Holcim Untervaz   | 800 [1]                | 2493 [2]                    |
| Holcim Siggenthal | 900 [3]                | 2567 [2]                    |
| Jura-Cement       | 800 [4]                | 2700 [5]                    |
| Ciments Vigier    | 900 [6]                | 2631*                       |
| Juracim           | 300 [7]                | 2631*                       |
| Holcim Ecl'epens  | 700 [8]                | 2764 [2]                    |

\* Average value of the other cement plants

Table S2: Waste heat sources within a cement plant and their average temperatures as reported by [9].

| Heat Source                                         | Inlet exhaust gas temperature | Outlet exhaust gas temperature | Heat output    |
|-----------------------------------------------------|-------------------------------|--------------------------------|----------------|
| Furnace exhaust heat exchanger                      | 420°C                         | 180°C                          | 3930 kW        |
| Chimney exhaust heat exchanger                      | 150°C                         | 120°C                          | 2110 kW        |
| <b>Total heat provision from exhaust waste heat</b> |                               |                                | <b>6040 kW</b> |
| Heat Source                                         | Inlet air temperature         | Outlet air temperature         | Heat output    |
| Rotary kiln                                         | 18.6°C                        | 92.9°C                         | 1300 kW        |
| Drying plant                                        | 92.9°C                        | 56.6°C                         | <b>A</b>       |

# Supplementary Information

## A.2 Municipal solid waste incinerators

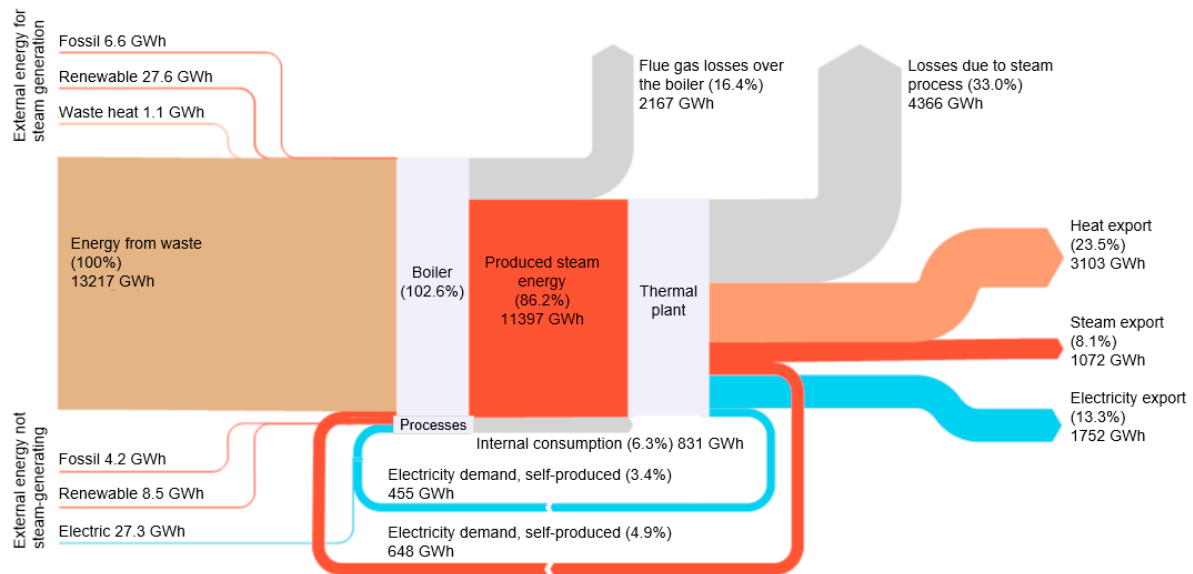

Figure S1: Representation of the energy flow of an average Swiss KVA in the year 2021, translated from [10].

## A.3 Biogas plants

Table S3: Average fermenter's own thermal energy demand depending on the output of the CHP plant, translated from [11].

| Type and power of the biogas plant                                 | Annual capacity (tonnes of fresh substance / year) | Input type                                | Temperatur-level | Fermenter's own thermal energy consumption (in % of the heat of the CHP) |
|--------------------------------------------------------------------|----------------------------------------------------|-------------------------------------------|------------------|--------------------------------------------------------------------------|
| Small agricultural biogas plant (30-60 kW <sub>el</sub> )          | <5000                                              | Mainly liquid manure                      | Mesophil         | 40-60%                                                                   |
| Medium-sized agricultural biogas plant (150-200 kW <sub>el</sub> ) | 8000-15000                                         | 80% manure<br>20% co-substrates           | Mesophil         | 30-40%                                                                   |
| Large agricultural biogas plant (300-500 kW <sub>el</sub> )        | 15000-30000                                        | 80% manure<br>20% co-substrates           | Mesophil         | 25-35%                                                                   |
| Industrial biogas plant (400-1000 kW <sub>el</sub> )               | 20000-30000                                        | Greenwastes and organic industrial wastes | Thermophil       | 10-30%                                                                   |

## Supplementary Information

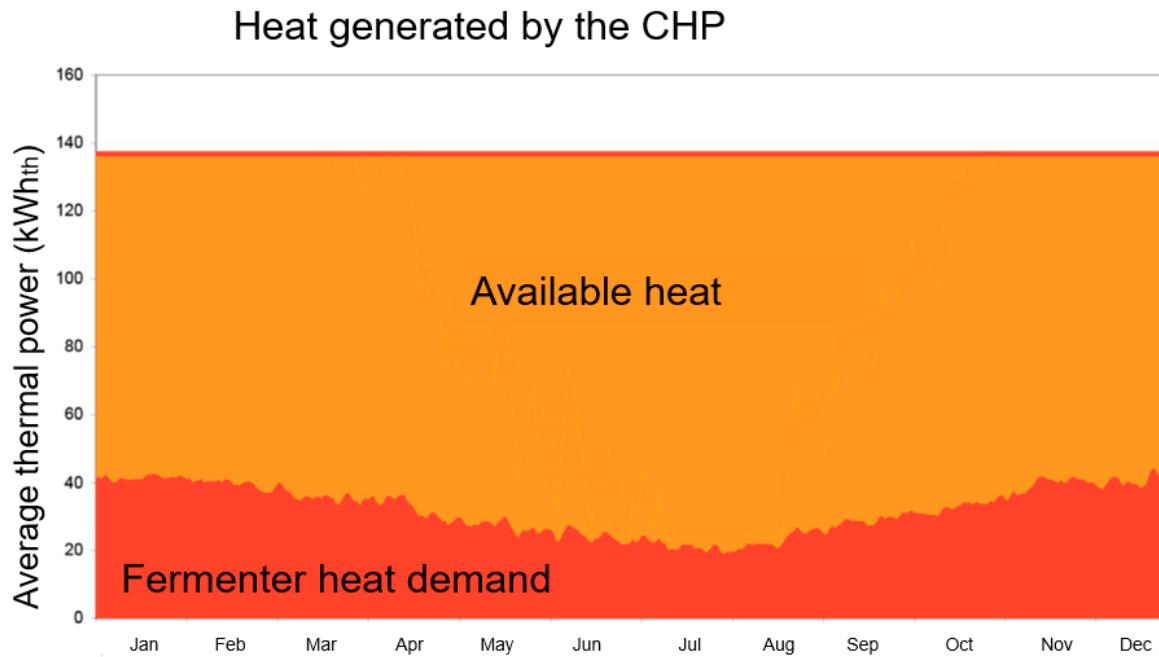

Figure S2: Heat demand of the fermenter during the year, translated from [10].

## B. Results

### B.1 Heat balance

Figure S3 illustrates Switzerland's annual heat balance at the municipal level, revealing a significant heat deficit in most areas, indicated by the negative balance in yellow–red. Thus, certain municipalities, shown in dark green, display significant surplus waste heat, often due to the presence of MSWIs or industries in those regions.

## Supplementary Information

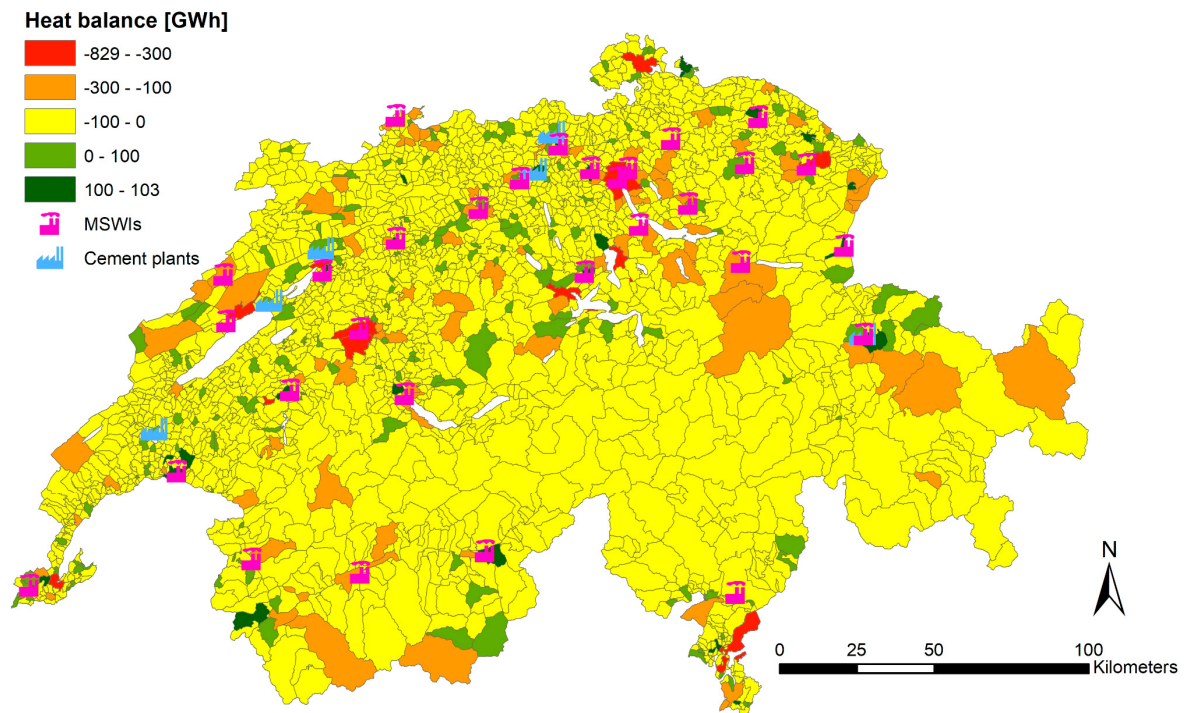

Figure S3. Total annual heat balance across all Swiss municipalities, along with municipal solid waste incinerators (MSWIs) and cement plants.

Within the temperature range below 45°C, no significant current heat demand was identified. Consequently, the heat balance in this range directly aligns with the waste heat within this temperature bracket, estimated at approximately 16.8 TWh. WWTPs contribute around 89%, and the industrial sector accounts for the remaining 11%. Regions with substantial waste heat below 45°C include major cities like Zurich, Basel, and Lausanne, as depicted in Figure S4, where significant WWTPs are located. The co-location of WWTPs and residential buildings holds potential for waste heat utilization.

## Supplementary Information

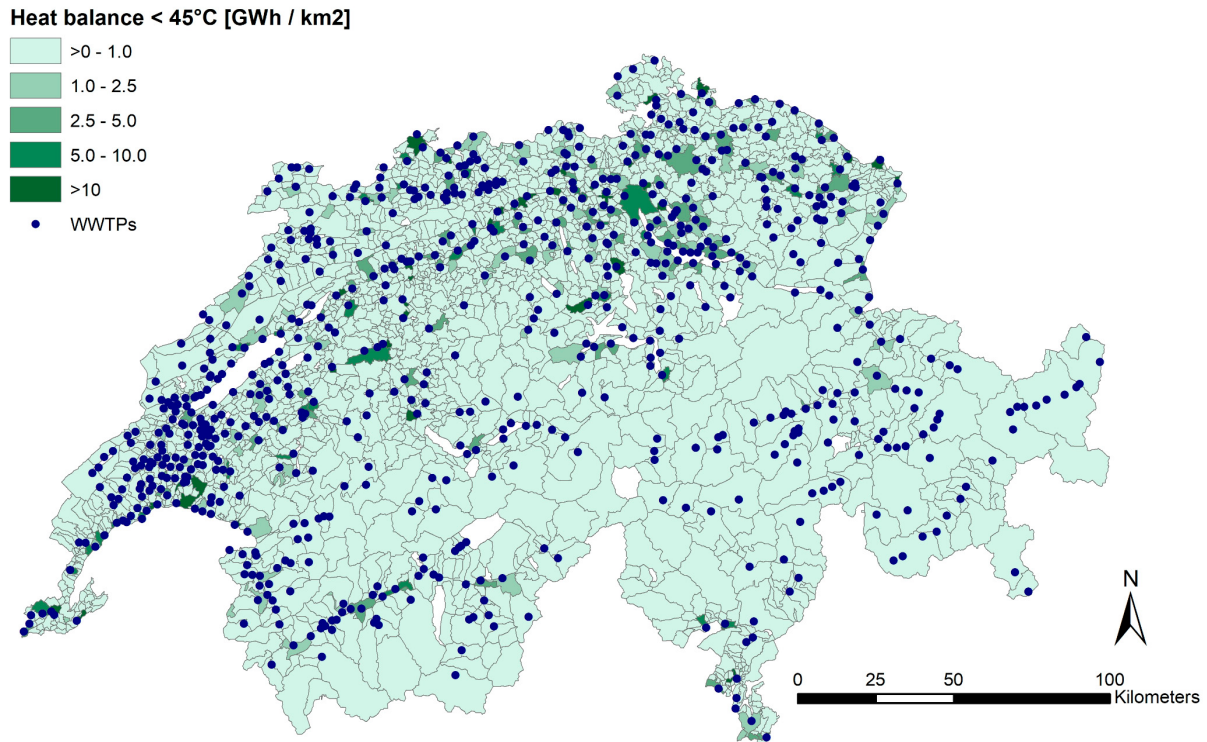

Figure S4: Total annual heat balance with temperatures below 45°C, per km<sup>2</sup> across all Swiss municipalities (= waste heat potential within this range, given the absence of quantifiable heat demand within this bracket), along with wastewater treatment plants (WWTPs).

Within the temperature range of 45°C to 70°C, a current heat demand was also not identified in this study, and the heat balance also corresponds to the waste heat potential. Waste heat within the temperature range of 45°C to 70°C is generated by various sources including industries and waste-to-energy facilities. This temperature range contributes 11.2 TWh of waste heat annually, making it the second-largest fraction after the waste heat below 45°C. Interestingly, the combined share of waste heat produced by biogas plants and cement plants is relatively small, accounting for less than 2%. The predominant contributor in this range is MSWIs, responsible for approximately 70% of the waste heat. Consequently, municipalities with MSWIs exhibit the highest waste heat potential within this category (see Figure S5).

## Supplementary Information

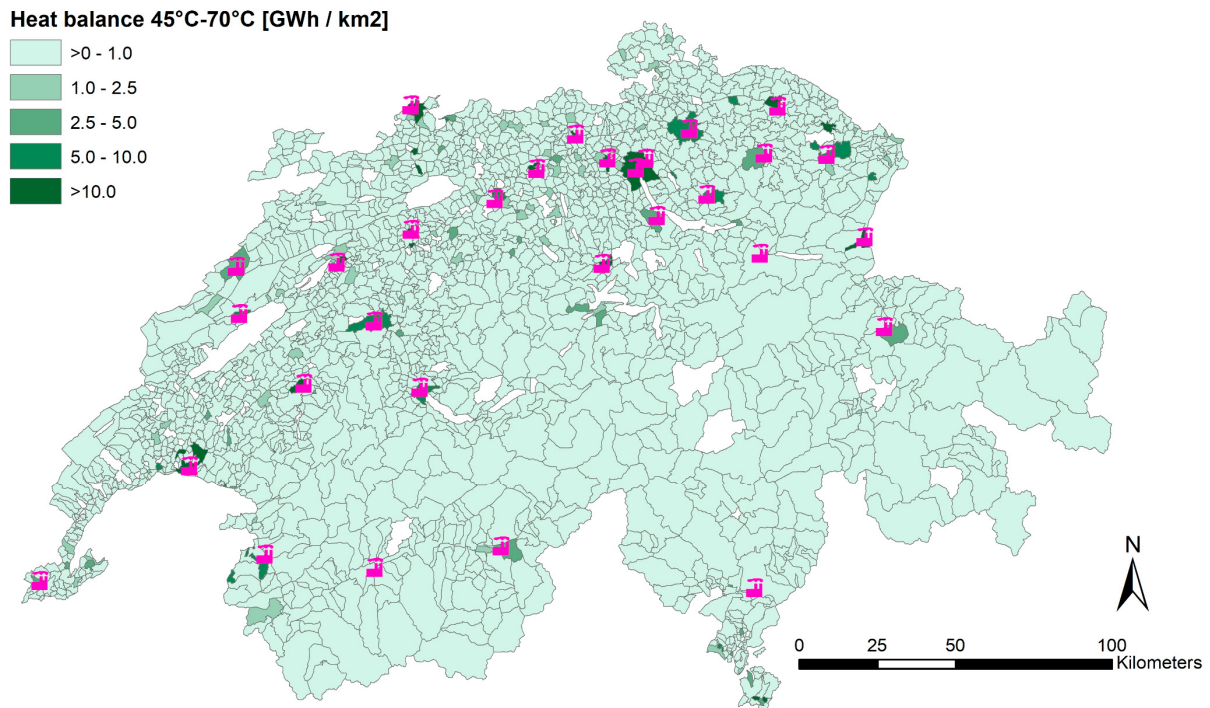

Figure S5: Total annual heat balance with temperatures between 45°C and 70°C, per km<sup>2</sup> across all Swiss municipalities (= waste heat potential within this range, given the absence of quantifiable heat demand within this bracket), along with municipal solid waste incinerators (MSWIs).

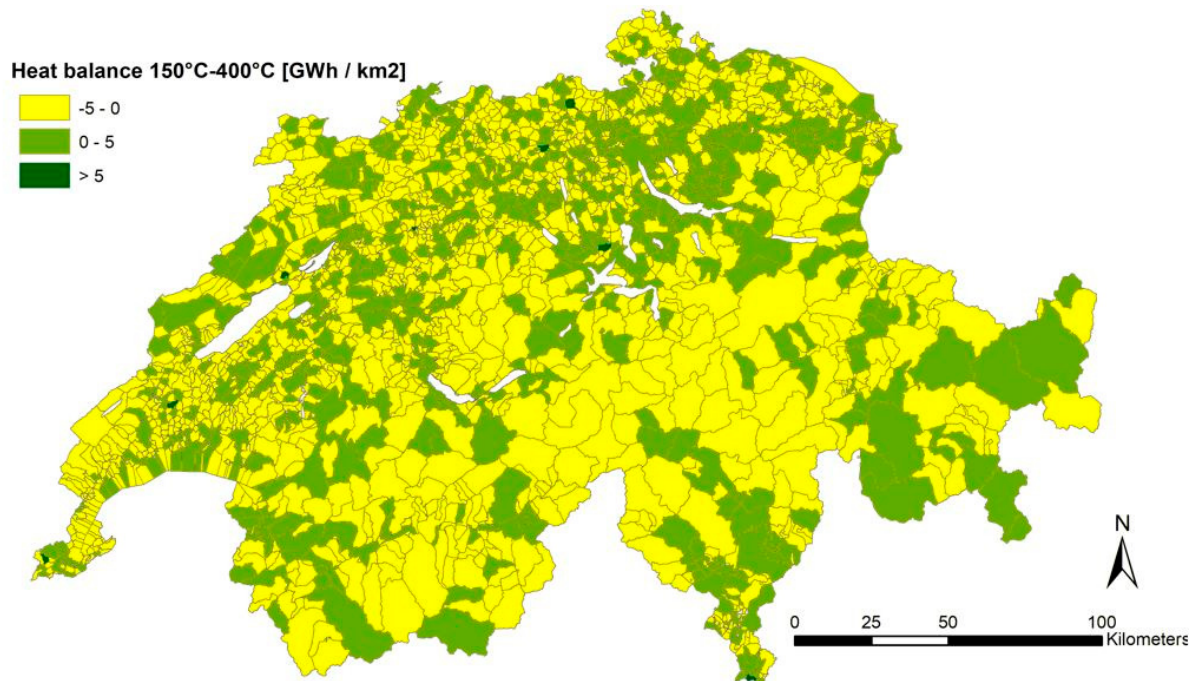

Figure S6: Total annual heat balance with temperatures between 150°C and 400°C, per km<sup>2</sup> across all Swiss municipalities.

# Supplementary Information

## Bibliography

1. Holcim Zementwerk Untervaz. [www.holcim.ch/de/zementwerk-untervaz](http://www.holcim.ch/de/zementwerk-untervaz)
2. Holcim *Umweltdaten 2020*; 2020; p 15.
3. Holcim Zementwerk Siggenthal. <https://www.holcim.ch/de/zementwerk-siggenthal>
4. Jura Zement ist unsere Leidenschaft: Portrait Jura Cement.  
<https://www.juramaterials.ch/de/ueber-uns/standorte-kontakte/jura-cement-fabriken-ag/portraet/portraet-juracement.html>
5. Jura Nachhaltigkeit in der Produktion.  
<https://www.juramaterials.ch/de/nachhaltigkeit/nachhaltigkeit-produktion/energie.html>
6. Vigier, C. Lösungen aus Leidenschaft. <https://www.vigier-ciment.ch>
7. Jura Zement ist unsere Leidenschaft: Portrait Juracime S.A.  
<https://www.juramaterials.ch/de/uns/standorte-kontakte/juracime-s-a/portraet/portraet-juracime.html>
8. Holcim Cimenterie Eclépens. <https://www.holcim.ch/fr/cimenterie-eclepens>
9. Hochwartner, R. *Innovative Niedertemperatur- und Abwärmenutzung im Zementherstellungsprozess unter Einsatz der Absorptionstechnik*; 2020; p 36.
10. Ryttec, A. *Einheitliche Heizwert- und Energiekennzahlenberechnung der Schweizer KVA nach europäischem Standardverfahren*; 2022; p 30.
11. Biomasse Suisse, A. U., Wärme aus Biogas - naheliegend. In *7. Bioenergie-Forum*, Biomasse Suisse: Bern, 2019.
